# Supplementary material
Source: PubMed Central journal article supplement (PMC3564481)
Supplement: Supp_Data.pdf [file Supp_Data.pdf]

## Supplementary Data

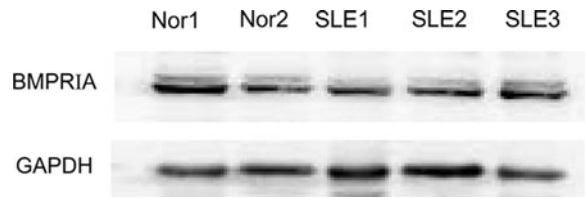

**SUPPLEMENTARY FIG. S1.** Western blotting analysis of BMPRI-A of BMMSCs from SLE patients. Nor, normal controls; SLE, systemic lupus erythematosus; BMP, bone morphogenetic protein; BMPR, BMP receptor; BMMSCs, bone marrow-derived mesenchymal stem cells.

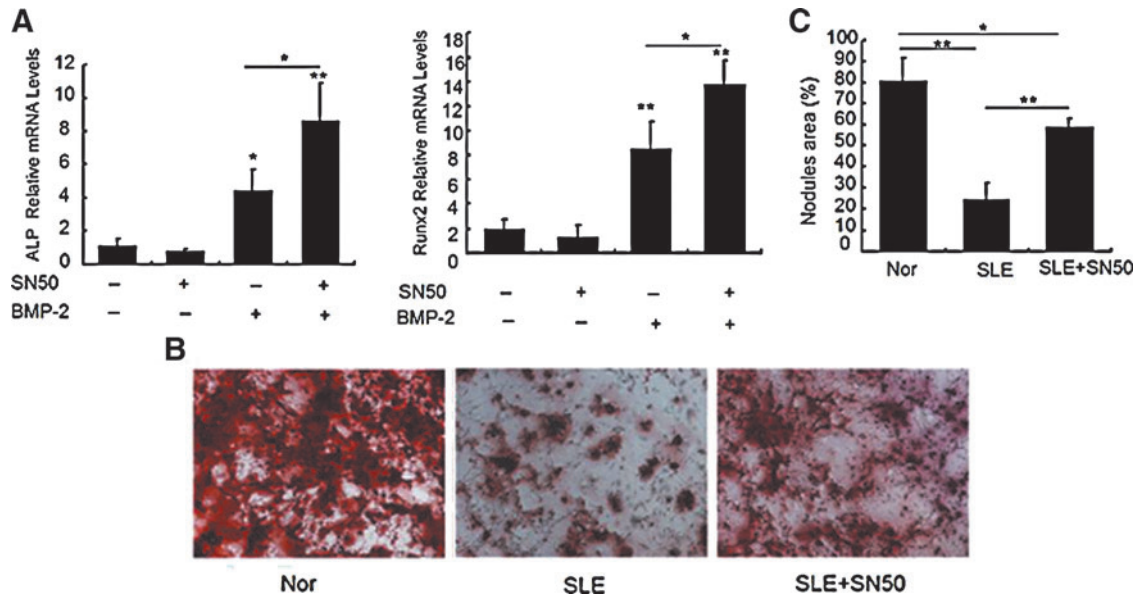

**SUPPLEMENTARY FIG. S2.** Effect of SN50 on BMP-2-induced osteogenic differentiation in SLE-BMMSCs. **(A)** qRT-PCR analysis of *ALP* and *Runx2* mRNA levels. Cells were pretreated with SN50 (50  $\mu\text{g}/\text{mL}$ ) for 30 min and harvested 48 h after addition of BMP-2. \* $P < 0.05$  and \*\* $P < 0.01$  versus controls or between the indicated groups ( $n = 3$ ). **(B)** Alizarin Red S staining of SLE-BMMSCs cultured in the OMB for 21 days in the presence or absence of SN50. **(C)** Quantity analysis of mineralization area. \* $P < 0.05$  and \*\* $P < 0.01$  between the indicated groups ( $n = 3$ ). Nor, normal controls; SLE, systemic lupus erythematosus. BMP-2, bone morphogenetic protein-2; qRT-PCR, quantitative reverse transcriptase-polymerase chain reaction; ALP, alkaline phosphatase; OMB, osteogenic medium with BMP-2.

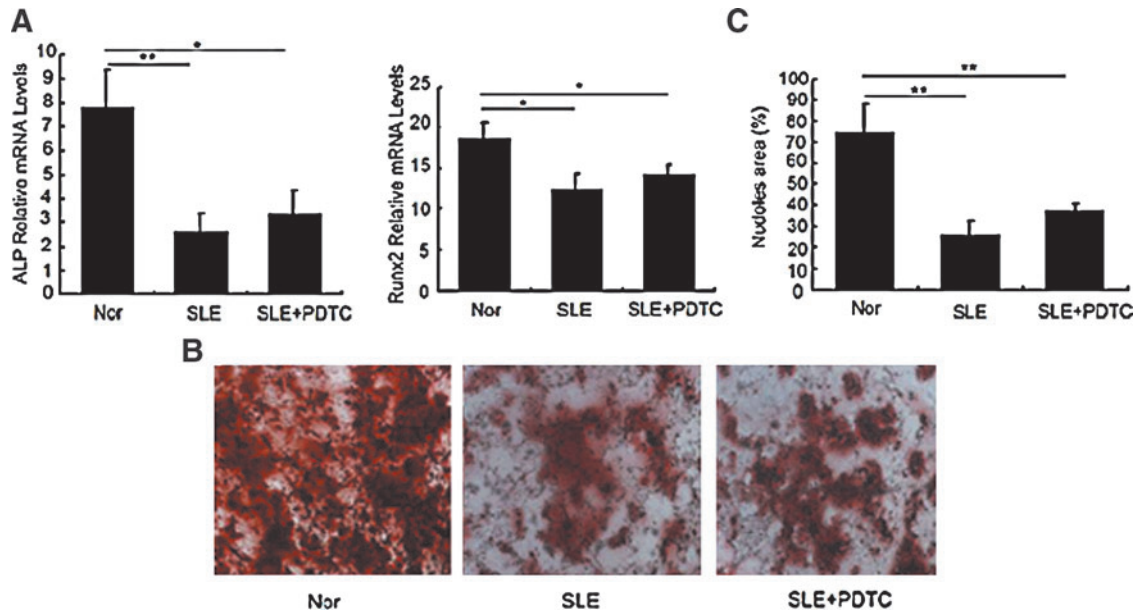

**SUPPLEMENTARY FIG. S3.** PDTC had no effect on the osteogenic differentiation of SLE-BMMSCs stimulated with ordinary osteogenic medium (Dex, GP, and AA). **(A)** qRT-PCR analysis of *ALP* and *Runx2* mRNA levels. Cells were treated with PDTC and ordinary osteogenic medium for 48 h. \* $P < 0.05$  and \*\* $P < 0.01$  between the indicated groups ( $n = 3$ ). **(B)** Alizarin Red S staining of SLE-BMMSCs cultured in the ordinary osteogenic medium for 21 days in the presence or absence of PDTC. **(C)** Quantity analysis of mineralization area. \*\* $P < 0.01$  between the indicated groups ( $n = 3$ ). Nor, normal controls; SLE, systemic lupus erythematosus; Dex, dexamethasone; GP,  $\beta$ -glycerophosphate; AA, ascorbic acid; PDTC, pyrrolidine dithiocarbamate.

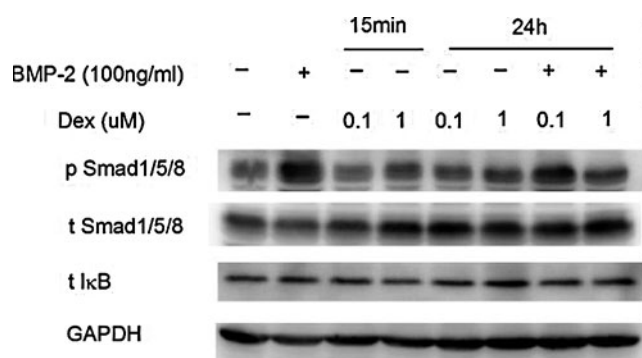

**SUPPLEMENTARY FIG. S4.** Effect of Dex on the activation of Smad1/5/8 and inhibitor  $\kappa$ B (I $\kappa$ B). Cells were starved and treated with Dex for 15 min or 24 h, then stimulated with BMP-2 for 30 min.

SUPPLEMENTARY TABLE S1. DEMOGRAPHIC DATA AND CLINICAL FEATURES OF BONE MARROW DONORS OF SYSTEMIC LUPUS ERYTHEMATOSUS PATIENTS FOR CDNA MICROARRAY ANALYSIS

| <i>Patient no.</i> | <i>Sex/age (years)</i> | <i>Disease duration (months)</i> | <i>SLEDAI</i> | <i>Clinical manifestations</i>                               | <i>Therapy</i> |
|--------------------|------------------------|----------------------------------|---------------|--------------------------------------------------------------|----------------|
| 1                  | F/20                   | 84                               | 14            | Nephritis, arthralgia, vasculitis                            | Pred, HCQ, CYC |
| 2                  | F/44                   | 12                               | 10            | Nephritis, arthralgia, cytopenia                             | Pred, HCQ, CYC |
| 3                  | F/43                   | 240                              | 19            | Nephritis, cytopenia, interstitial pneumonia                 | Pred, HCQ, CYC |
| 4                  | F/42                   | 6                                | 20            | Nephritis, cytopenia, interstitial pneumonia, polyserositis, | Pred, HCQ, CYC |

SLEDAI, systemic lupus erythematosus disease activity index; Pred, prednisone; CYC, cyclophosphamide; HCQ, hydroxychloroquine.

SUPPLEMENTARY TABLE S2. DEMOGRAPHIC DATA AND CLINICAL FEATURES OF SYSTEMIC LUPUS ERYTHEMATOSUS PATIENTS TESTED FOR SERUM LEVELS OF BONE MORPHOGENETIC PROTEIN-2

| <i>Patient no.</i> | <i>Sex Age (years)</i> | <i>Disease Duration (months)</i> | <i>SLEDAI</i> | <i>Clinical manifestations</i>                | <i>Therapy</i> |
|--------------------|------------------------|----------------------------------|---------------|-----------------------------------------------|----------------|
| 1                  | F/41                   | 40                               | 11            | Cytopenia, hemophagocytic lymphohistiocytosis | Pred, HCQ      |
| 2                  | F/18                   | 48                               | 4             | Nephritis, cytopenia                          | Pred, LEF, HCQ |
| 3                  | F/34                   | 84                               | 10            | Nephritis, cytopenia                          | Pred, CYC, HCQ |
| 4                  | F/52                   | 122                              | 15            | Nephritis, cytopenia, interstitial pneumonia  | Pred, CYC, MMF |
| 5                  | F/54                   | 120                              | 10            | Nephritis, seizures                           | Prod, CYC, HCQ |
| 6                  | F/27                   | 180                              | 2             | Cytopenia                                     | Pred, CYC, HCQ |
| 7                  | F/45                   | 10                               | 11            | Nephritis, cytopenia                          | Pred, HCQ      |
| 8                  | M/13                   | 15                               | 9             | Nephritis                                     | Pred, HCQ      |
| 9                  | F/57                   | 108                              | 9             | Nephritis, interstitial pneumonia             | Pred, HCQ, CsA |
| 10                 | F/46                   | 17                               | 9             | Nephritis, cytopenia, arthralgia              | Pred, HCQ      |
| 11                 | F/18                   | 15                               | 18            | Nephritis, arthralgia,                        | Pred, CYC, HCQ |
| 12                 | F/17                   | 6                                | 8             | Cytopenia, arthralgia                         | Pred, HCQ      |
| 13                 | F/25                   | 5                                | 9             | Nephritis                                     | Pred, CYC, HCQ |
| 14                 | F/27                   | 36                               | 2             | Femur head necrosis                           | Pred, HCQ, HCQ |
| 15                 | F/18                   | 36                               | 15            | Vasculitis                                    | Pred, HCQ      |
| 16                 | F/41                   | 1                                | 21            | Nephritis, cytopenia, vasculitis              | Pred, CYC, HCQ |

Pred, prednisone; CYC, cyclophosphamide; HCQ, hydroxychloroquine; LEF, leflunomide; CsA, cyclospori.
