# Supplementary material
Source: PubMed Central journal article supplement (PMC3564481)
Supplement: Supp_Fig1.pdf [file Supp_Fig1.pdf]

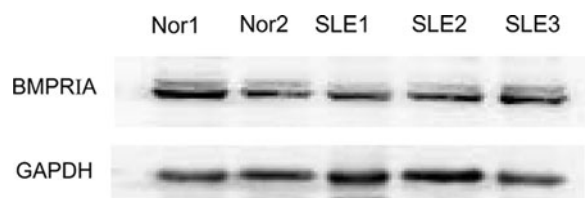

**SUPPLEMENTARY FIG. S1.** Western blotting analysis of BMPRI-A of BMMSCs from SLE patients. Nor, normal controls; SLE, systemic lupus erythematosus; BMP, bone morphogenetic protein; BMPR, BMP receptor; BMMSCs, bone marrow-derived mesenchymal stem cells.
