# Supplementary material
Source: PubMed Central journal article supplement (PMC3564481)
Supplement: Supp_Fig4.pdf [file Supp_Fig4.pdf]

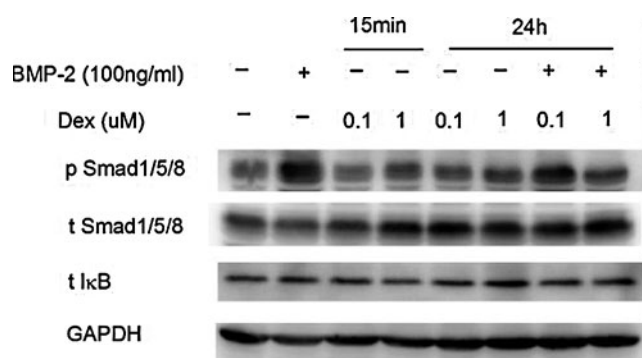

**SUPPLEMENTARY FIG. S4.** Effect of Dex on the activation of Smad1/5/8 and inhibitor  $\kappa$ B (I $\kappa$ B). Cells were starved and treated with Dex for 15 min or 24 h, then stimulated with BMP-2 for 30 min.
