# Supplementary material
Source: PubMed Central journal article supplement (PMC3564481)
Supplement: Supp_Table1.pdf [file Supp_Table1.pdf]

SUPPLEMENTARY TABLE S1. DEMOGRAPHIC DATA AND CLINICAL FEATURES OF BONE MARROW DONORS OF SYSTEMIC LUPUS ERYTHEMATOSUS PATIENTS FOR CDNA MICROARRAY ANALYSIS

| <i>Patient no.</i> | <i>Sex/age (years)</i> | <i>Disease duration (months)</i> | <i>SLEDAI</i> | <i>Clinical manifestations</i>                               | <i>Therapy</i> |
|--------------------|------------------------|----------------------------------|---------------|--------------------------------------------------------------|----------------|
| 1                  | F/20                   | 84                               | 14            | Nephritis, arthralgia, vasculitis                            | Pred, HCQ, CYC |
| 2                  | F/44                   | 12                               | 10            | Nephritis, arthralgia, cytopenia                             | Pred, HCQ, CYC |
| 3                  | F/43                   | 240                              | 19            | Nephritis, cytopenia, interstitial pneumonia                 | Pred, HCQ, CYC |
| 4                  | F/42                   | 6                                | 20            | Nephritis, cytopenia, interstitial pneumonia, polyserositis, | Pred, HCQ, CYC |

SLEDAI, systemic lupus erythematosus disease activity index; Pred, prednisone; CYC, cyclophosphamide; HCQ, hydroxychloroquine.
