# Supplementary material
Source: PubMed Central journal article supplement (PMC3564481)
Supplement: Supp_Table2.pdf [file Supp_Table2.pdf]

SUPPLEMENTARY TABLE S2. DEMOGRAPHIC DATA AND CLINICAL FEATURES OF SYSTEMIC LUPUS ERYTHEMATOSUS PATIENTS TESTED FOR SERUM LEVELS OF BONE MORPHOGENETIC PROTEIN-2

| <i>Patient no.</i> | <i>Sex Age (years)</i> | <i>Disease Duration (months)</i> | <i>SLEDAI</i> | <i>Clinical manifestations</i>                | <i>Therapy</i> |
|--------------------|------------------------|----------------------------------|---------------|-----------------------------------------------|----------------|
| 1                  | F/41                   | 40                               | 11            | Cytopenia, hemophagocytic lymphohistiocytosis | Pred, HCQ      |
| 2                  | F/18                   | 48                               | 4             | Nephritis, cytopenia                          | Pred, LEF, HCQ |
| 3                  | F/34                   | 84                               | 10            | Nephritis, cytopenia                          | Pred, CYC, HCQ |
| 4                  | F/52                   | 122                              | 15            | Nephritis, cytopenia, interstitial pneumonia  | Pred, CYC, MMF |
| 5                  | F/54                   | 120                              | 10            | Nephritis, seizures                           | Prod, CYC, HCQ |
| 6                  | F/27                   | 180                              | 2             | Cytopenia                                     | Pred, CYC, HCQ |
| 7                  | F/45                   | 10                               | 11            | Nephritis, cytopenia                          | Pred, HCQ      |
| 8                  | M/13                   | 15                               | 9             | Nephritis                                     | Pred, HCQ      |
| 9                  | F/57                   | 108                              | 9             | Nephritis, interstitial pneumonia             | Pred, HCQ, CsA |
| 10                 | F/46                   | 17                               | 9             | Nephritis, cytopenia, arthralgia              | Pred, HCQ      |
| 11                 | F/18                   | 15                               | 18            | Nephritis, arthralgia,                        | Pred, CYC, HCQ |
| 12                 | F/17                   | 6                                | 8             | Cytopenia, arthralgia                         | Pred, HCQ      |
| 13                 | F/25                   | 5                                | 9             | Nephritis                                     | Pred, CYC, HCQ |
| 14                 | F/27                   | 36                               | 2             | Femur head necrosis                           | Pred, HCQ, HCQ |
| 15                 | F/18                   | 36                               | 15            | Vasculitis                                    | Pred, HCQ      |
| 16                 | F/41                   | 1                                | 21            | Nephritis, cytopenia, vasculitis              | Pred, CYC, HCQ |

Pred, prednisone; CYC, cyclophosphamide; HCQ, hydroxychloroquine; LEF, leflunomide; CsA, cyclospori.
